# Supplementary material for: Aerosol optical properties derived from POLDER-3/PARASOL (2005–2013) over the western Mediterranean Sea: I. Quality assessment with AERONET and in situ airborne observations
Source: Copernicus journal article supplement (doi:10.5194/amt-2018-251), 2018-08-16
Supplement: Supplementary file 1 [file amt-2018-251-supplement.pdf]

1 **Supplementary material of Formenti et al., Aerosol optical properties derived from**  
2 **POLDER-3/PARASOL (2005-2013) over the western Mediterranean sea: I. Quality**  
3 **assessment with AERONET and in situ airborne observations**

4  
5 **Table S1.** Modal diameter ( $D_0$ ), geometric standard deviation ( $\sigma_0$ ) and effective diameter ( $D_{\text{eff}}$ ) of the  
6 log-normal distribution as well as real part of the refractive index ( $m_r$ ) of the aerosol models over ocean  
7 of the POLDER-3 Look-Up Table (LUT).

| Parameters                         | Fine mode                 | Spherical coarse mode | Non spherical coarse mode |
|------------------------------------|---------------------------|-----------------------|---------------------------|
| $D_0$ ( $\mu\text{m}$ )            | 0.08, 0.16, 0.20, 0.26    | 1.56                  | 0.90, 1.50                |
| $\sigma_0$                         | 0.46                      | 0.69                  | 0.69                      |
| $D_{\text{eff}}$ ( $\mu\text{m}$ ) | 0.136, 0.272, 0.34, 0.442 | 5.10                  | 2.96, 4.92                |
| $m_r$                              | 1.35, 1.45, 1.60          | 1.33, 1.35, 1.37      | 1.53                      |

8

9 **Figure S1.** Ratio of the coarse to the total AOD ( $AOD_C/AOD$ ) by AERONET as a function of  
10 the cut-off diameter ( $D_{cut-off}$ ) between the fine and coarse aerosol particle modes.

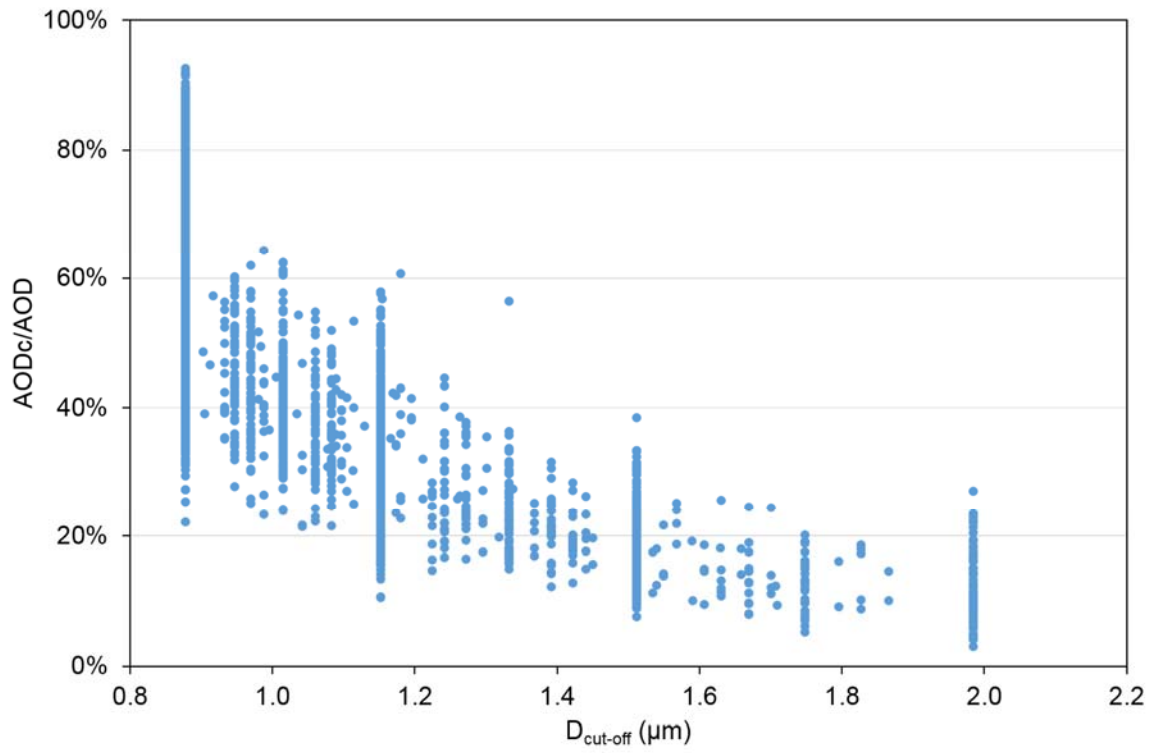

11

12

## 13 **Supplementary A. Assessment of the size distribution**

14 Here we provide details of the procedure to estimate the aerosol particle size distribution from  
15 the measurements of the PCASP, UHSAS and Grimm optical counters operated on board the  
16 ATR42 during TRAQA and ADRIMED. This also requires to assess the particles complex  
17 refractive index.

### 18 **S.1. Correction for complex refractive index**

19 The operating principle of the particle optical counters is based on the angular dependence of  
20 the light scattering intensity to the particle size through optical Mie theory (Mie, 1908; Wendisch  
21 and Brenguier, 2013). The optical particle counters provide the number size distribution at an  
22 optical equivalent diameter ( $D_{EO}$ ) corresponding to the measured intensity of the scattered  
23 radiation at the value of the complex refractive index  $m$  used for calibration. This is generally  
24 done with latex spheres (or equivalent standard material) for which  $m$  is equal to  $1.59 - i0$ .  
25 Henceforth, to represent the actual aerosol, the value of  $D_{EO}$  needs to be converted into a  
26 particle equivalent geometrical diameter ( $D_{EG}$ ), corresponding to the real value of the complex  
27 refractive index. This correction depends on aerosol composition and the geometrical and  
28 spectral characteristics of the particle counter (Reid et al., 2003; Denjean et al, 2016).

29 The equivalence between  $D_{EO}$  and  $D_{EG}$  was established by calculation using the Mie theory for  
30 homogeneous spherical particles (Bohren and Huffman, 1998). Examples of this equivalence  
31 for a range of  $m$  values is shown in Figure S2 for the particle optical counters used in this study  
32 (UHSAS, PCASP and Grimm).

33

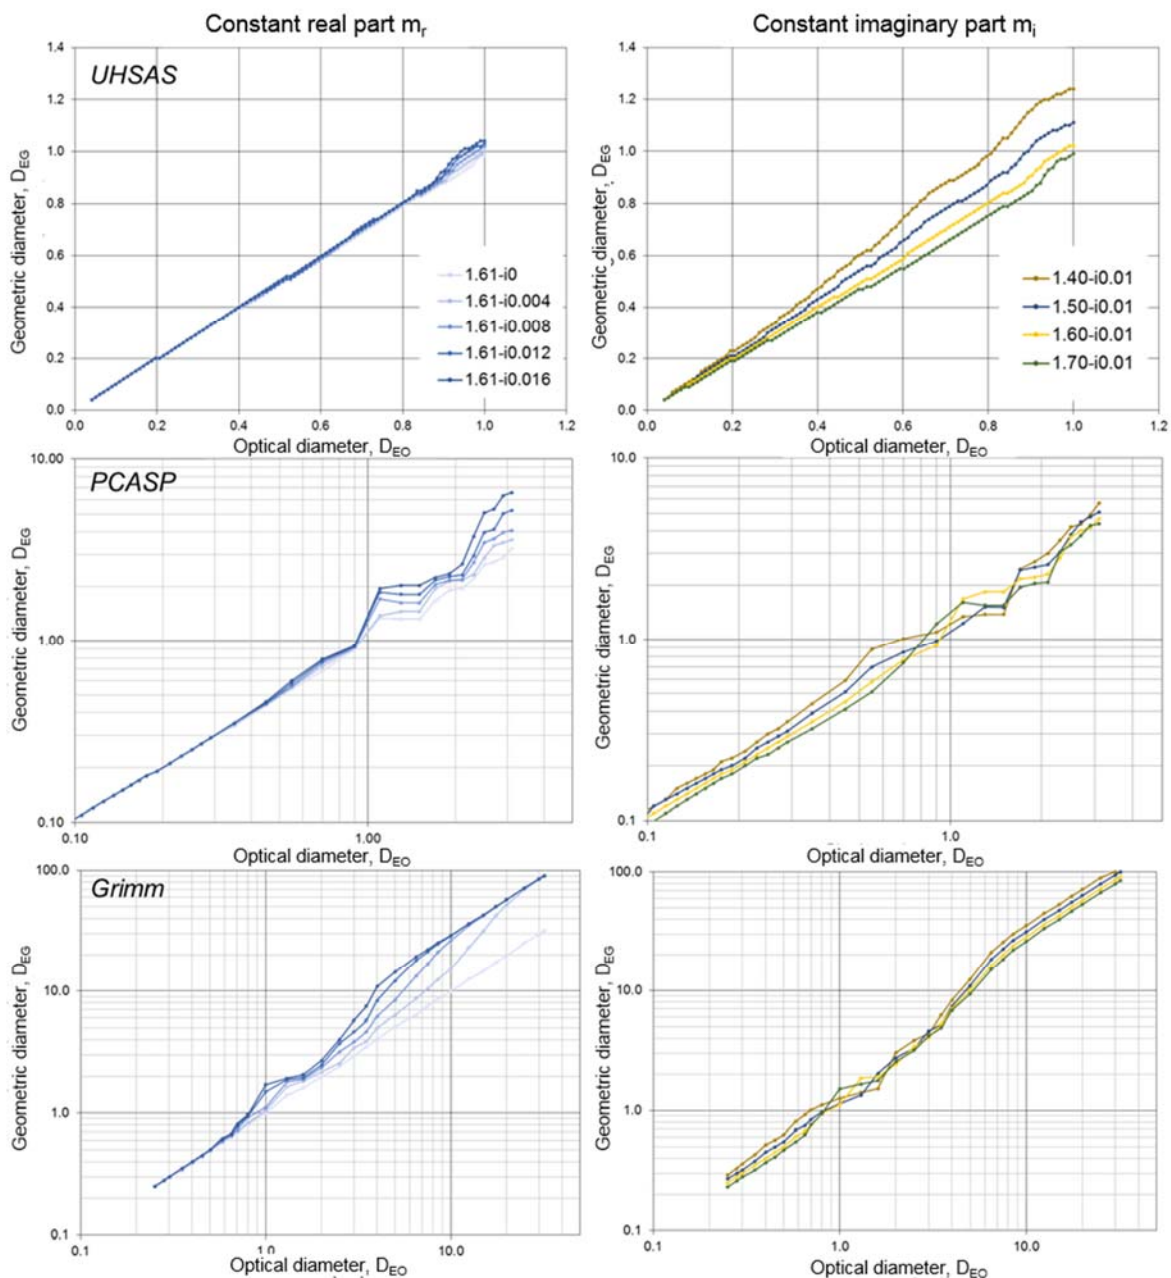

34

35 **Figure S2.** Scatterplot of the geometric-equivalent diameter ( $D_{EG}$ ) with respect to the optical-equivalent  
 36 diameter ( $D_{EO}$ ) for various refractive indices with real part fixed at 1.61 (left) and imaginary part fixed at  
 37 0.01 (right), for UHSAS (top), PCASP (middle), and Grimm (bottom).

38

39 The relation between  $D_{EO}$  and  $D_{EG}$  is not linear with size. The real and imaginary parts of the  
 40 refractive index modify significantly the particle diameter, notably above 0.6  $\mu\text{m}$ . The imaginary  
 41 part of the refractive index has a greater influence at diameters larger than 1  $\mu\text{m}$ , whereas the  
 42 real part affects more the submicron aerosols. Figure A1 also shows the equivalence between  
 43  $D_{EO}$  and  $D_{EG}$  is not unique, especially for  $D_{EO}$  around 1  $\mu\text{m}$ .

## 44 S.2. Combination of optical counter measurements

45 The combination of the size spectra measured by the PCASP, UHSAS, and Grimm was  
46 performed by examining their overlap over their common measurement size ranges. The  
47 combination was performed as follows. First, the measured size distributions were visually  
48 inspected to establish whether, at the calibration refractive index ( $m_{\text{latex}} = 1.59 - 0i$ ), the  
49 observations by the counters coincided on their common size range. This analysis was  
50 repeated after applying the geometric equivalence correction according to the refractive index  
51 (that is, on the size distributions expressed as a function of  $D_{EG}$ ). When the difference between  
52 the particle number concentration measured by the two counters (at pairs) was lower than the  
53 sum of the absolute counting errors ( $\sqrt{dN}$  according to the Poisson statistics), the agreement  
54 was considered as satisfactory. A boundary diameter ( $D_{\text{cover}}$ ) was then defined in the overlap  
55 zone to generate a new combined size distribution from the PCASP or UHSAS in the particle  
56 diameter range  $D'_{EG} \leq D_{\text{COVER}}$  and the Grimm counter in the range  $D''_{EG} \geq D_{\text{COVER}}$  (with  $D''_{EG}$  up  
57 to the AVIRAD inlet cut-off diameter), so that

$$59 \quad \frac{dN_{\text{tot}}(D_{EG})}{d \log D_{EG}} = \frac{dN_{\text{PCASP}}(D'_{EG})}{d \log D'_{EG}} + \frac{dN_{\text{Grimm}}(D''_{EG})}{d \log D''_{EG}} \quad (\text{S1.a})$$

60

$$61 \quad \frac{dN_{\text{tot}}(D_{EG})}{d \log D_{EG}} = \frac{dN_{\text{UHSAS}}(D'_{EG})}{d \log D'_{EG}} + \frac{dN_{\text{Grimm}}(D''_{EG})}{d \log D''_{EG}} \quad (\text{S1.b})$$

62

63 **Figure S3** shows a schematic representation of the combination between both size  
64 distributions.

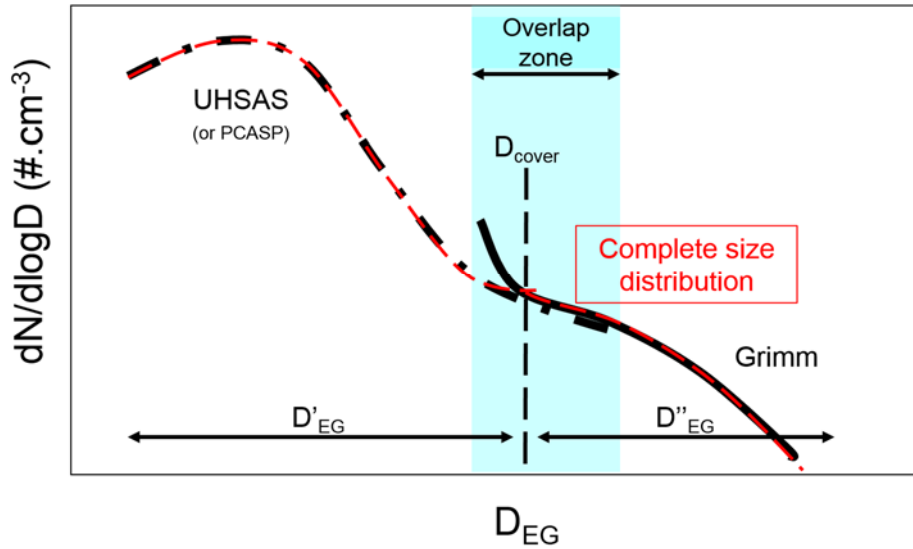

65

66 **Figure S3.** Schematics of the combination of the number size distributions between UHSAS (or PCASP)  
 67 and Grimm around  $D_{cover}$ . The overlap zone is indicated in blue. The black curves represent the  
 68 distributions measured by the two counters in pairs, corrected by the refractive index (e.g., expressed  
 69 as  $D_{EG}$ ). The red curves represent the combined size distributions of the two optical counters over the  
 70 combination of the domain of  $D_{EG}'$  (for UHSAS or PCASP) and  $D_{EG}''$  for the Grimm. In each diameter  
 71 range below and over  $D_{cover}$ ,  $d\log D_{EG}$  values and counting errors remain those of the respective  
 72 counter.

73

74 The overlapping zone change whether we work with PCASP (TRAQA campaign) or UHSAS  
 75 (ADRIDMED campaign).  $D_{cover}$  ranged between 0.23 and 0.7  $\mu\text{m}$  for the TRAQA campaign when  
 76 the PCASP and the Grimm were operated, and between 0.23 and 0.9  $\mu\text{m}$  during ADRIMED  
 77 when the UHSAS and the Grimm were operated.

78 To make sure that the total number of particles was conserved after the recombination and the  
 79 modification of the size classes by the refractive index, we applied the conservation equation  
 80 of the total number of particles

81

$$82 \quad N_{EG} = N_{EO} \quad (\text{S2.a})$$

83

$$84 \quad N_{EO} = \int_{D_{EO,min}}^{D_{EO,max}} \frac{dN_{EO}(D_{EO})}{d\log D_{EO}} d\log D_{EO} \quad (\text{S2.b})$$

85

86 
$$N_{EG} = \int_{D_{EG,min}}^{D_{EG,max}} \frac{dN_{EG}(D_{EG})}{d\log D_{EG}} d\log D_{EG} \quad (\text{S2.c})$$

87

88 where  $N_{EO}$  is the total number of particles corresponding to the measurement (for the refractive  
89 index  $m_{latex}$ ) and  $N_{EG}$  is the total number of particles after correction of the refractive index.

90 Finally, the extended size distributions  $\frac{dN_{EG}(D_{EG})}{d\log D_{EG}}$  obtained by the recombination of the optical

91 particle counters were fitted by a multi modal normalized log-normal distributions as

92

93 
$$\frac{1}{N_{EG}} \frac{dN_{EG}(D_{EG})}{d\log D_{EG}} = \sum_i \frac{n_i}{\sigma_i \sqrt{2\pi}} \exp\left(-\frac{(\log D - \log D_{0,i})^2}{2\sigma_i^2}\right) \quad (\text{S3})$$

94

95 where  $n_i$  is the total number of particles,  $\sigma_i$  the geometric standard deviation and  $D_{0,i}$  the modal  
96 (geometric mean) diameter of the mode  $i$ .

97 The log-normal fit of the reconstructed size distribution was done with the MPFIT routine  
98 available under IDL (Markwardt, 2009; <http://purl.com/net/mpfit>). The calculation routine  
99 considers the result as correct if the difference  $\epsilon_{FIT}$  between the sum of the squares of the input  
100 size distribution and its deconvolution is less than  $10^{-10}$  after 100 iterations. To limit error due  
101 to an over- or underestimation of the total number of particle  $N_{EG}$ , not constrained in this  
102 routine, the calculation was repeated several times, on normalized size distributions, by  
103 modifying the initial parameters until the calculated size distribution is within the limits of the  
104 counting uncertainties of the experimental size distributions. Examples of deconvolutions are  
105 shown in **Figure S4**.

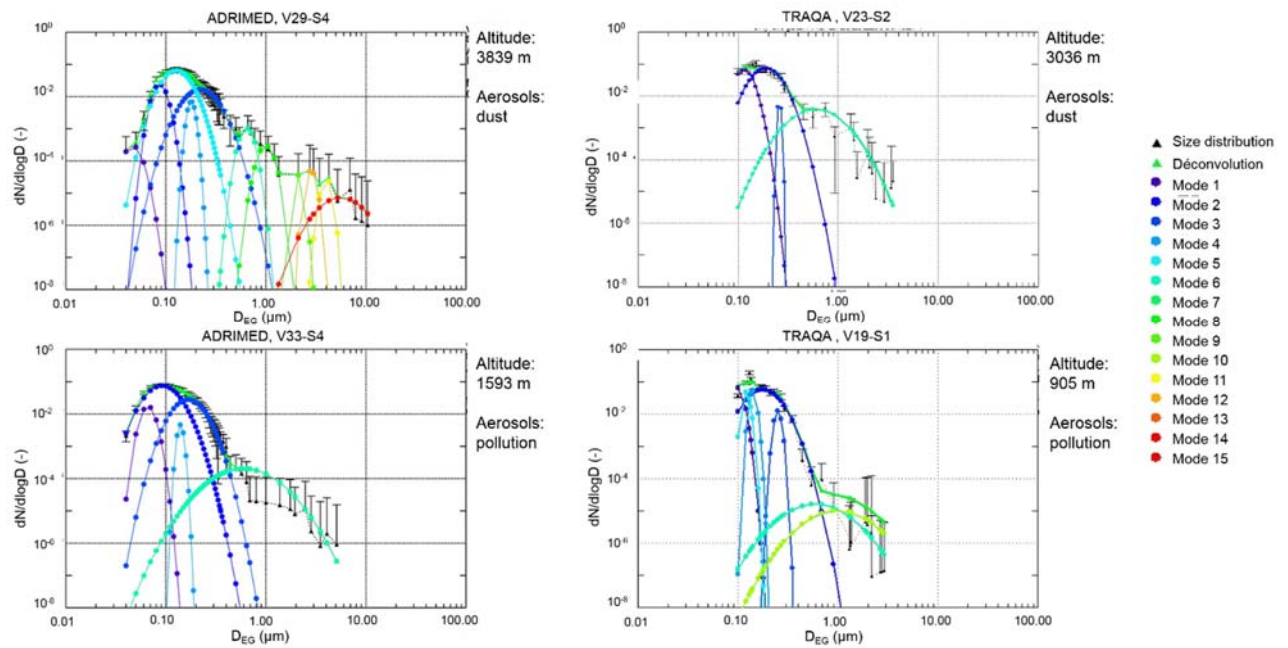

106

107 **Figure S4.** Examples of reconstructed normalized number size distributions and their decomposition in  
 108 log-normal modes for case studies of desert dust (upper panels) and pollution aerosols (lower panels)  
 109 during ADRIMED and TRAQA. The deconvolution was performed with the IDL MPFIT routine for up to  
 110 15 different log-normal distribution modes. The uncertainties correspond to the Poisson statistical error.

111

112 Up to 11 modes were needed to fit the size distributions, of which up to 6 modes for  $D_{EG} < 1$   
 113  $\mu\text{m}$ . These do not necessarily have a physical meaning but are regarded as a way of  
 114 reproducing the volume distribution at the highest possible size resolution.

### 115 S.3. Assessment of the complex refractive index

116 The complex refractive index necessary to estimate  $D_{EG}$ , and therefore correct the measured  
 117 size distributions according to the optical equivalent diameter  $D_{EO}$ , are based on published  
 118 values in the literature, some of them especially for our region of study (Ackermann, 1998;  
 119 Petzold et al., 2009; Ryder et al., 2013; Di Biagio et al., 2015; Denjean et al., 2016; Sicard et  
 120 al., 2016). The different values are presented in **Table S2**.

121

122

123



| Aerosol               | Campaign      | Wavelength (nm)                               | Refractive index                              | References                    |
|-----------------------|---------------|-----------------------------------------------|-----------------------------------------------|-------------------------------|
| Pollution (fine mode) | TRAQA, SAFMED | 632.8                                         | $(1.50 - 1.72) - i 0.01$                      | <i>Di Biagio et al., 2015</i> |
| Pollution (soot)      | ---           | 355                                           | $1.75 - i 4.64 \cdot 10^{-1}$                 | <i>Ackermann, 1998</i>        |
|                       |               | 532                                           | $1.75 - i 4.46 \cdot 10^{-1}$                 |                               |
|                       |               | 1064                                          | $1.76 - i 1.43 \cdot 10^{-1}$                 |                               |
| Marine                | ---           | 355                                           | $1.51 - i 3.22 \cdot 10^{-8}$                 | <i>Ackermann, 1998</i>        |
|                       |               | 532                                           | $1.50 - i 1.12 \cdot 10^{-8}$                 |                               |
|                       |               | 1064                                          | $1.47 - i 1.92 \cdot 10^{-4}$                 |                               |
| Desert dust           | ---           | 355                                           | $1.53 - i 1.66 \cdot 10^{-2}$                 | <i>Ackermann, 1998</i>        |
|                       |               | 532                                           | $1.53 - i 6.33 \cdot 10^{-3}$                 |                               |
|                       |               | 1064                                          | $1.53 - i 4.30 \cdot 10^{-3}$                 |                               |
|                       | ADRIMED       | 530                                           | $(1.51 - 1.57) - i (1.0 - 4.6) \cdot 10^{-3}$ | <i>Denjean et al., 2016</i>   |
|                       | SAMUM         | 450                                           | $(1.55 - 1.57) - i (3.1 - 5.2) \cdot 10^{-3}$ | <i>Petzold et al., 2009</i>   |
|                       |               | 550                                           | $(1.55 - 1.56) - i (1.6 - 4.2) \cdot 10^{-3}$ |                               |
|                       | 700           | $(1.55 - 1.56) - i (0.3 - 2.5) \cdot 10^{-3}$ | <i>Ryder et al., 2013</i>                     |                               |
| FENNEC                | 550           | $1.53 - i (1.0 - 3.0) \cdot 10^{-3}$          |                                               |                               |
| Mixed aerosols        | AERONET       | 440                                           | $(1.42 - 1.48) - i (2.8 - 4.7) \cdot 10^{-3}$ | <i>Sicard et al., 2016</i>    |

125 **Table S2.** Compilation of published values of refractive index and their wavelengths, for different aerosol  
 126 type with some of them especially for our region of study (Mediterranean Sea).

127

128 In the absence of complementary information on the variability of the chemical composition  
 129 with size, the refractive index was considered as independent on particle size. The refractive  
 130 index for mixed aerosols ( $AE_{scatt}$  between 0.5 and 1.0) was calculated as volume-weighted  
 131 averages of pollution aerosols and desert dust as

132

$$133 \quad m = \sum_i f_i \times m_i \quad (S4)$$

134

135 where  $f_i$  et  $m_i$  are the volume fractions and the complex refractive index of two types of aerosols  
 136  $i$ , respectively. We assumed arbitrarily that  $f_i = 0.8$  for desert dust and  $f_i = 0.2$  for pollution  
 137 aerosols for  $AE_{scatt} \leq 0.75$ , and  $f_i = 0.2$  for desert dust and  $f_i = 0.8$  for pollution aerosols for  $AE_{scat}$   
 138  $> 0.75$ . The extrapolation to our working wavelengths (450, 532, 550, 700 and 865 nm) was  
 139 done by assuming the spectral dependences obtained by Ackermann (1998) between 355 and  
 140 532 nm and between 532 and and 1064 nm. The spectral dependence was applied to the  
 141 refractive index for desert dust and mixed aerosols obtained by Di Biagio et al. (2016) and  
 142 Denjean et al. (2016) for case studies during TRAQA and ADRIMED.

143 **S.4. Comparison between in situ measurements and calculations of the extinction and**  
 144 **scattering coefficient**

145 The validation of the number size distributions reconstructed from airborne measurements,  
 146 henceforth their ability in yielding the column-integrated but size-segregated extinction, was  
 147 assessed by calculating, on 30-second averages, the extinction coefficient  $\sigma_{\text{ext}}$  at 532 nm and  
 148 the scattering coefficient  $\sigma_{\text{scatt}}$  at 450, 550 and 700 nm, and by comparing them to  $\sigma_{\text{ext}}$   
 149 measured by the CAPS-PMex (only operated during ADRIMED) and to  $\sigma_{\text{scatt}}$  measured by the  
 150 nephelometer, respectively. The comparisons were evaluated by examining the correlation  
 151 coefficient R, the root-mean square error (RMS) and the bias (B) of their linear regression. The  
 152 complex refractive index at each wavelength was varied until the best agreement between  
 153 calculated and measured  $\sigma_{\text{scatt}}$  and  $\sigma_{\text{ext}}$  was achieved within the estimated error bars. The  
 154 retrieved refractive index matching measurements and calculations are summarized in **Table**  
 155 **S3.**

| Aerosol type              | Complex refractive index $m$ at various wavelengths |                             |                             |                             |                             |                             |                             |                             |                             |
|---------------------------|-----------------------------------------------------|-----------------------------|-----------------------------|-----------------------------|-----------------------------|-----------------------------|-----------------------------|-----------------------------|-----------------------------|
|                           | 450 nm                                              | 532 nm                      | 550 nm                      | 632.5 nm                    | 655 nm                      | 670 nm                      | 700 nm                      | 865 nm                      | 1054 nm                     |
| Clear layer / maritime    | (1.40-1.50) -i(0 - 0.002)                           |                             |                             |                             |                             |                             |                             |                             |                             |
| Desert dust               | (1.50-1.57) -i(0.004-0.007)                         | (1.50-1.57) -i(0.002-0.004) |                             |                             |                             |                             |                             | (1.50-1.57) -i(0.002-0.003) | (1.50-1.57) -i(0.001-0.003) |
| Pollution                 | (1.41-1.77) -i(0.002-0.022)                         | (1.41-1.77) -i(0.002-0.018) | (1.41-1.77) -i(0.002-0.017) | (1.41-1.77) -i(0.002-0.015) | (1.41-1.77) -i(0.002-0.014) | (1.41-1.77) -i(0.002-0.014) | (1.41-1.77) -i(0.002-0.013) | (1.42-1.78) -i(0.001-0.010) | (1.42-1.79) -i(0.001-0.008) |
| Mixed aerosol (AE ≤ 0.75) | (1.48-1.61) -i(0.004-0.010)                         | (1.48-1.61) -i(0.002-0.007) | (1.48-1.61) -i(0.002-0.007) | (1.48-1.61) -i(0.002-0.006) | (1.48-1.61) -i(0.002-0.006) | (1.48-1.61) -i(0.002-0.006) | (1.48-1.61) -i(0.002-0.005) | (1.48-1.61) -i(0.002-0.005) | (1.48-1.61) -i(0.002-0.004) |
| Mixed aerosol (AE > 0.75) | (1.43-1.73) -i(0.002-0.019)                         | (1.43-1.73) -i(0.002-0.015) | (1.43-1.73) -i(0.002-0.014) | (1.43-1.73) -i(0.002-0.013) | (1.43-1.73) -i(0.002-0.012) | (1.43-1.73) -i(0.002-0.012) | (1.43-1.73) -i(0.002-0.011) | (1.43-1.73) -i(0.001-0.009) | (1.43-1.74) -i(0.001-0.007) |

156 **Table S3.** Best-guess of the spectral refractive index obtained for the corrections of the optical particle  
 157 counter, and comparison of measurements and calculations for clear layer/maritime aerosol, desert  
 158 dust, pollution and mixed aerosol. The values extrapolated to 670 and 870 nm (working wavelengths of  
 159 POLDER-3) are also shown.

160

161 The results of the comparison at 550 ( $\sigma_{scatt}$ ) and 532 nm ( $\sigma_{ext}$ ) are illustrated in **Figure S5**. The  
162 uncertainties associated with the evaluation of the size distribution, the measured scattering  
163 and extinction, and finally the aerosol optical depth retrieved are estimated as the quadratic  
164 sum of the instrumental uncertainties as well as with the variability due to the reduction of the  
165 native time-resolution to a common time step of 30 seconds, a standard deviation generically  
166 indicated here as  $\Delta_{30sec}$ . The instrumental uncertainties for the nephelometer and the CAPS-  
167 PMex are evaluated as  $\pm 10\%$  for submicron aerosols (Anderson et al., 1996), and  $\pm 3.2\%$   
168 (Massoli et al., 2010), respectively. The error on the number of particle  $n_i$  ( $i$  = generic bin)  
169 follows the Poisson's law as  $\Delta_{Poisson} = \sqrt{n_i}$ . The comparison between measured and calculated  
170  $\sigma_{scatt}$  at 450 and 700 nm are not shown as they are analogous to those at 550 nm.

171

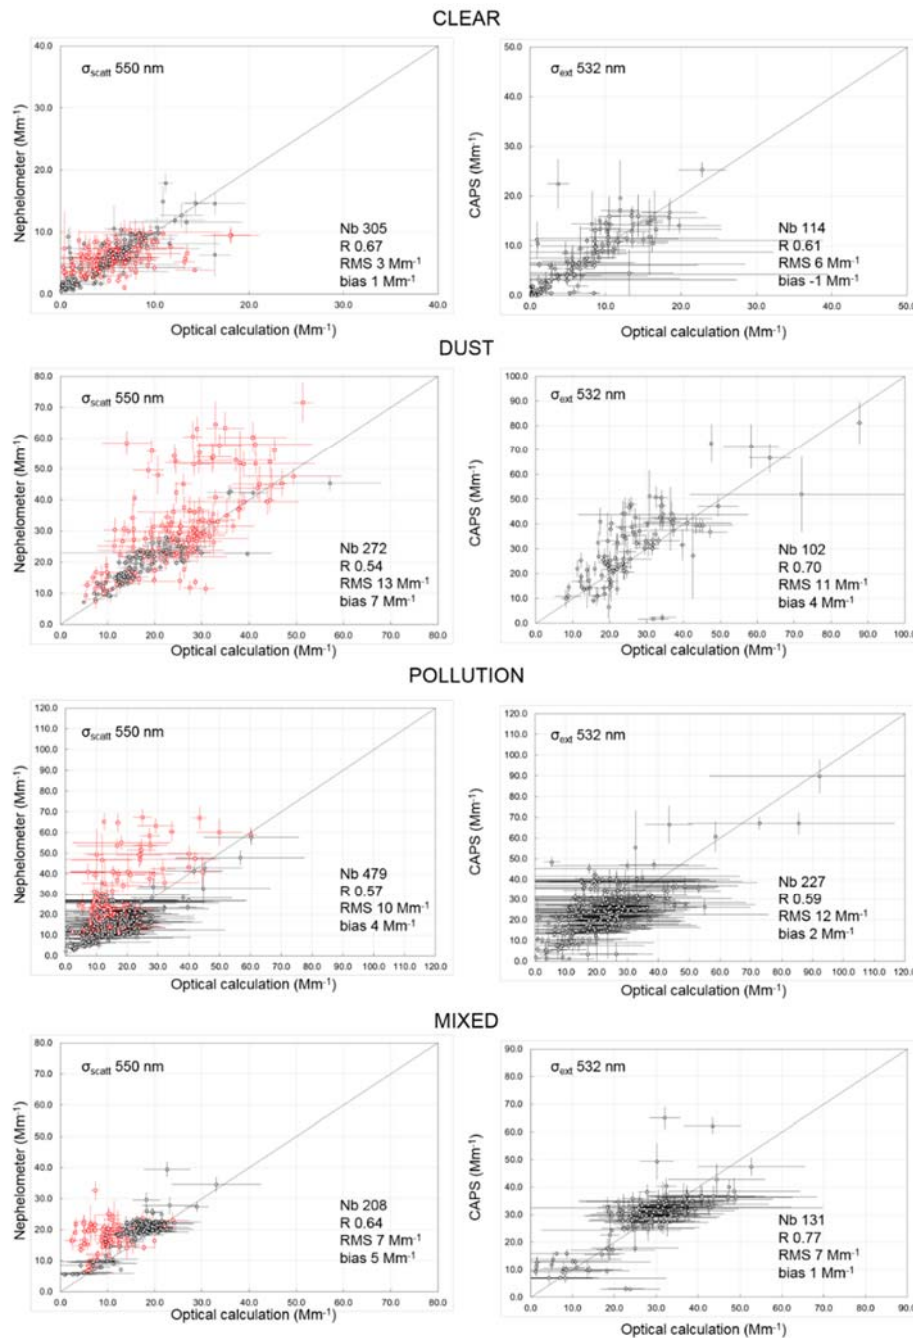

172

173 **Figure S5.** Comparison of optical calculation and measurements of  $\sigma_{scatt}$  at 550 nm and  $\sigma_{ext}$  at 532 nm  
 174 for all aerosol layers of all vertical profiles during TRAQA (red) and ADRIMED (black) campaigns. The  
 175 comparison for  $\sigma_{ext}$  is shown only for ADRIMED since there were no CAPS-PMex measurements during  
 176 TRAQA. See the text for error bars calculation.

177

178 The comparison is satisfactory for all aerosol types, and in particular concerning  $\sigma_{ext}$ . The  
 179 systematic underestimation of the larger values of  $\sigma_{scatt}$  during TRAQA is due to the faulty  
 180 operation of the Grimm OPC above 350 m from sea level. These data points were removed  
 181 from the dataset for POLDER-3 AOD and AOD<sub>C</sub> evaluation while kept for the evaluation of

182  $AOD_F$  which is not affected by errors in sizing the largest particles. The uncertainties for the  
183 optical computation of  $\sigma_{scatt}$  are higher for pollution layers than for other types of aerosols. This  
184 is due to the wide range of possible values of the refractive index.
